# Supplementary material for: Metagenomics of Parkinson’s disease implicates the gut microbiome in multiple disease mechanisms
Source: Springer Nature journal article supplement (doi:10.1038/s41467-022-34667-x), 2022-11-14

## **Metagenomics of Parkinson’s disease implicates the gut microbiome in multiple disease mechanisms**

Supplementary Figure 1. Metadata questionnaires .....2

Supplementary Figure 2. Global composition of gut metagenome in  
PD differs from NHC .....12

Supplementary Figure 3. PD-associated species’ abundance distribution  
and fold change .....13

Supplementary Figure 4. Species correlation networks for PD and  
neurologically healthy controls .....15

**Supplementary Figure 1. Metadata questionnaires.** Following STORMs reporting guidelines for human microbiome research, (PMID: 34789871) we are providing the questionnaires in full and have highlighted the questions whose data were used as metadata in the current study. Questionnaires and a stool sampling kit were given to the subjects to take home, self-complete, and return via postal service.

**For Research Laboratory Use Only**

Subject ID: \_\_\_\_\_ PD \_\_\_\_\_ RBD \_\_\_\_\_ Control \_\_\_\_\_ Day sample received M \_\_\_\_\_ D \_\_\_\_\_ Y \_\_\_\_\_

*Interactions of Gut Microbiome, Genetic Susceptibility, and Environmental Factors in Parkinson's Disease*  
A Research Study Funded by The United States Department of Defense

## GUT MICROBIOME QUESTIONNAIRE

Thank you for participating in this research study. Please complete this form immediately after collecting the stool sample and send it back with the stool sample and the completed Environmental & Family History Questionnaire in the enclosed pre-stamped envelope. If you have any questions, please call 205-934-0371.

Today's date (day of stool sample collection): Month \_\_\_\_\_ Day \_\_\_\_\_ Year \_\_\_\_\_

Your Name: \_\_\_\_\_

Sex: ☐ M ☐ F

Birthdate: Month \_\_\_\_\_ Day \_\_\_\_\_ Year \_\_\_\_\_

Phone \_\_\_\_\_

Email \_\_\_\_\_

On the **DAY OF STOOL COLLECTION** did you have:

Abdominal pain or discomfort ☐ No ☐ Yes

Bloating ☐ No ☐ Yes

Diarrhea ☐ No ☐ Yes

Excess gas ☐ No ☐ Yes

Constipation (no bowel movement for 3 days prior to stool collection) ☐ No ☐ Yes

In this **Bristol Stool Chart**, circle the type of stool that you passed today from which you collected the sample:

|        |                                                 |                                                                                      |
|--------|-------------------------------------------------|--------------------------------------------------------------------------------------|
| Type 1 | Separate hard lumps, like nuts hard to pass     |  |
| Type 2 | Sausage shaped but lumpy                        |  |
| Type 3 | Like sausage but with cracks on its surface     |  |
| Type 4 | Like sausage or snake, smooth and soft          |  |
| Type 5 | Soft blobs with clear cut edges (passed easily) |  |
| Type 6 | Fluffy pieces with ragged edges, a mushy stool  |  |
| Type 7 | Watery, no solid pieces                         | ENTIRELY LIQUID                                                                      |

How tall are you? Feet\_\_\_\_\_ Inches\_\_\_\_\_

How much do you weigh? Pounds\_\_\_\_\_

Have you lost more than 10 pounds in the last year? ☐ No ☐ Yes

Have you gained more than 10 pounds in the last year? ☐ No ☐ Yes

In a typical week, how many hours of sleep do you get each night? \_\_\_\_\_ hours

Do you smoke cigarettes, cigars or a pipe? ☐ No ☐ Yes

Do you drink caffeinated coffee, caffeinated tea, or caffeinated soda? ☐ No ☐ Yes

Do you drink alcohol? ☐ No ☐ Yes

## DIET

How often do you eat **GRAINS** (rice, bread, pasta)?

☐ At least once a day

☐ Few times a week

☐ Few times a month

☐ Less than once a month or never

How often do you eat **POULTRY, BEEF, PORK, SEAFOOD, EGGS?**

☐ At least once a day

☐ Few times a week

☐ Few times a month

☐ Less than once a month or never

How often do you eat **FRUITS or VEGETABLES?**

☐ At least once a day

☐ Few times a week

☐ Few times a month

☐ Less than once a month or never

How often do you eat **NUTS?**

☐ At least once a day

☐ Few times a week

☐ Few times a month

☐ Less than once a month or never

How often do you eat **YOGURT?**

☐ At least once a day

☐ Few times a week

☐ Few times a month

☐ Less than once a month or never

## MEDICAL CONDITIONS

Do you have Parkinson's disease? ☐ No ☐ Yes

Do you have rapid eye movement sleep behavior disorder (RBD)? ☐ No ☐ Yes

Are you often constipated (fewer than 3 bowel movements per week occurring frequently)? ☐ No ☐ Yes

Do you have Diarrhea often (once a week or more, type 7 in Bristol stool chart)? ☐ No ☐ Yes

Do you have Irritable Bowel Syndrome (IBS) or spastic colon? ☐ No ☐ Yes

Do you have Inflammatory Bowel Disease (IBD)? ☐ No ☐ Yes

Do you have Small Intestinal Bacterial Overgrowth (SIBO)? ☐ No ☐ Yes

Have you had an Ulcer in the past three months? ☐ No ☐ Yes

Do you have Celiac disease? ☐ No ☐ Yes

Do you have Crohn's disease? ☐ No ☐ Yes

Do you have Colitis? ☐ No ☐ Yes

Have you had a cancer of the digestive system in the last 3 months? ☐ No ☐ Yes

## MEDICATIONS

Are you currently taking antibiotics? ☐ No ☐ Yes

Have you completed a course of antibiotics in the past 3 months? ☐ No ☐ Yes

Do you take laxatives at least once a week? ☐ No ☐ Yes

Do you take drugs for indigestion or reflux at least once a week? ☐ No ☐ Yes

Do you take anti-inflammatory drugs at least once a week? ☐ No ☐ Yes

Are you currently being treated for cancer with radiation or chemotherapy? ☐ No ☐ Yes

Are you taking blood thinners? ☐ No ☐ Yes

Are you taking cholesterol medication? ☐ No ☐ Yes

Are you taking blood pressure medication? ☐ No ☐ Yes

Are you taking thyroid medication? ☐ No ☐ Yes

Are you taking medication for asthma or COPD? ☐ No ☐ Yes

Are you taking medication for diabetes, high blood sugar, insulin? ☐ No ☐ Yes

Are you taking pain medication? ☐ No ☐ Yes

Are you taking medication for depression, anxiety, mood? ☐ No ☐ Yes

Are you on birth control pills or estrogen replacement therapy? ☐ No ☐ Yes

Are you taking Antihistamines? ☐ No ☐ Yes

Do you take Probiotic supplements? ☐ No ☐ Yes

Do you take Co-Q 10 supplements? ☐ No ☐ Yes

Do you take a sleep aid to help you fall asleep or stay asleep? ☐ No ☐ Yes

Are you **CURRENTLY** taking any **PARKINSON MEDICATIONS**? ☐ No ☐ Yes

If no, you can skip the rest of the form.

If yes, check all medications that you are taking (we have given the two names available for each medication).

**Levodopa preparations:**

- ☐ No ☐ Yes Sinemet or immediate release Carbidopa-Levodopa mg/pill\_\_\_\_\_ Number of Pills/day\_\_\_\_\_
- ☐ No ☐ Yes Sinemet CR or Carbidopa/Levodopa ER mg/pill\_\_\_\_\_ Number of Pills/day\_\_\_\_\_
- ☐ No ☐ Yes Rytary or Carbidopa/levodopa Capsules mg/pill\_\_\_\_\_ Number of Pills/day\_\_\_\_\_
- ☐ No ☐ Yes Duopa or levodopa intestinal gel mg/24 hrs\_\_\_\_\_
- ☐ No ☐ Yes Stalevo or Carbidopa/levodopa/entacapone mg/pill\_\_\_\_\_ Number of Pills/day\_\_\_\_\_

**Dopamine agonist drugs:**

- ☐ No ☐ Yes Mirapex or Pramipexole immediate release or ER mg/pill\_\_\_\_\_ Number of Pills/day\_\_\_\_\_
- ☐ No ☐ Yes Requip or Ropinirole immediate release or XR mg/pill\_\_\_\_\_ Number of Pills/day\_\_\_\_\_
- ☐ No ☐ Yes Neupro or Rotigotine patch mg/patch\_\_\_\_\_
- ☐ No ☐ Yes Apokyn or apomorphine injections or infusion cc/injection\_\_\_\_\_ Number of injections/day\_\_\_\_\_

**COMT Inhibitors:**

- ☐ No ☐ Yes Comtan or Entacapone mg/pill\_\_\_\_\_ Number of Pills/day\_\_\_\_\_
- ☐ No ☐ Yes Tasmar or tolcapone mg/pill\_\_\_\_\_ Number of Pills/day\_\_\_\_\_

**MAO Inhibitors:**

- ☐ No ☐ Yes Azilect or Rasagiline mg/pill\_\_\_\_\_ Number of Pills/day\_\_\_\_\_
- ☐ No ☐ Yes Eldepryl or Deprenyl or Selegiline mg/pill\_\_\_\_\_ Number of Pills/day\_\_\_\_\_
- ☐ No ☐ Yes Xadago or Safinamide mg/pill\_\_\_\_\_ Number of Pills/day\_\_\_\_\_

**Anticholinergic drugs:**

- ☐ No ☐ Yes Artane or Trihexyphenidyl mg/pill\_\_\_\_\_ Number of Pills/day\_\_\_\_\_
- ☐ No ☐ Yes Cogentin or Benztropine mg/pill\_\_\_\_\_ Number of Pills/day\_\_\_\_\_

**Other medication for Parkinson:**

- ☐ No ☐ Yes Symmetrel or Amantadine mg/pill\_\_\_\_\_ Number of Pills/day\_\_\_\_\_

**Other Parkinson medications:**

1. Medication name \_\_\_\_\_ mg/pill\_\_\_\_\_ Number of Pills/day\_\_\_\_\_
2. Medication name \_\_\_\_\_ mg/pill\_\_\_\_\_ Number of Pills/day\_\_\_\_\_
3. Medication name \_\_\_\_\_ mg/pill\_\_\_\_\_ Number of Pills/day\_\_\_\_\_

**Thank you for completing the questionnaire.**

**Please mail it back with the stool sample and the Environmental & Family History Questionnaire using the pre-stamped envelope. You may drop the envelope at any US postal service box.**

Subject ID: \_\_\_\_\_

PD \_\_\_\_\_

RBD \_\_\_\_\_

Control \_\_\_\_\_

*Interactions of Gut Microbiome, Genetic Susceptibility, and Environmental Factors in Parkinson's Disease*  
A Research Study Funded by The United States Department of Defense

## ENVIRONMENTAL & FAMILY HISTORY QUESTIONNAIRE

Thank you for participating in this research study. Please complete this form and send it back with the stool sample and the completed Gut Microbiome Questionnaire in the enclosed pre-stamped envelope. If you have any questions, please call 205-934-0371.

Today's Date: \_\_\_\_\_

Name: \_\_\_\_\_

Sex: ☐ M ☐ F

Birthdate: Month \_\_\_\_\_ Day \_\_\_\_\_ Year \_\_\_\_\_

Phone: (\_\_\_\_\_) \_\_\_\_\_

Email: \_\_\_\_\_

Address: \_\_\_\_\_ City \_\_\_\_\_ State \_\_\_\_\_ Zip Code \_\_\_\_\_

### MEDICAL CONDITIONS

Do you have **Parkinson's disease**? ☐ No ☐ Yes

diagnosis was by patient's movement  
disorder specialist

How old were you when you first noticed a sign of Parkinson's disease (age at onset)? \_\_\_\_\_ years old

At what age did you receive the diagnosis of Parkinson's disease (age at diagnosis)? \_\_\_\_\_ years old

Do you have **Rapid eye movement sleep Behavior Disorder (RBD)**? ☐ No ☐ Yes

At what age did you receive the diagnosis of RBD? \_\_\_\_\_ years old

Have you had a stroke, ataxia, multiple sclerosis, Alzheimer's disease, dementia, dystonia, autism, bipolar disorder, amyotrophic lateral sclerosis (ALS), or epilepsy? ☐ No ☐ Yes

- If Yes, circle the disorder.

Exclusion criteria for  
controls

### HEAD INJURY

Have you had a head injury that caused loss of consciousness or required medical care? ☐ No ☐ Yes

If yes, how old were you when it first happened? \_\_\_\_\_ years old

Did you have repeated blows to the head such as in sports or military? ☐ No ☐ Yes

### TOXINS

Were you ever exposed to Agent Orange or other chemical warfare? ☐ No ☐ Yes ☐ Don't know

Were you ever exposed to heavy uses of pesticides or herbicides, for example, did you live on or near farms that did crop dusting? ☐ No ☐ Yes

If yes, how old were you (give the range, for example, from birth until age 16) \_\_\_\_\_

## TOBACCO

Have you smoked at least 100 cigarettes (about 5 packs) in your entire lifetime? ☐ Yes ☐ No  
If you never smoked at least 100 cigarettes, go to "CAFFEINE" section.

During the time that you smoked, how much did you smoke on average, and for how many years?  
Check all that apply.

- ☐ Less than ½ pack per day, for \_\_\_\_\_ years (*specify number of years*)
- ☐ Equal to or more than ½ pack but less than 1 pack per day, for \_\_\_\_\_ years
- ☐ Equal to or more than 1 pack but less than 2 packs per day, for \_\_\_\_\_ years
- ☐ Equal to or more than 2 packs per day, for \_\_\_\_\_ years

At what age did you begin smoking? \_\_\_\_\_

Are you still smoking? ☐ Yes ☐ No If not, at what age did you stop? \_\_\_\_\_

How many cigarettes do you currently smoke?

- ☐ None
- ☐ Less than ½ pack per day
- ☐ Equal to or more than ½ pack but less than 1 pack per day
- ☐ Equal to or more than 1 pack but less than 2 packs per day
- ☐ Equal to or more than 2 packs per day

## CAFFEINE

How much caffeinated **COFFEE** do you (or did you) drink, and for how many years?

A **cup** is the size of a china cup. A **mug** is 2 cups. Check all that apply.

- ☐ None
- ☐ Less than 2 cups a week, for \_\_\_\_\_ years (*specify number of years*)
- ☐ Equal to or more than 2 but not more than 6 cups a week, for \_\_\_\_\_ years
- ☐ 1-2 cups a day, for \_\_\_\_\_ years
- ☐ 3-5 cups a day, for \_\_\_\_\_ years
- ☐ 6 or more cups a day, for \_\_\_\_\_ years

At what age did you start drinking caffeinated coffee? \_\_\_\_\_ years old

Are you still drinking caffeinated coffee? ☐ Yes ☐ No If not, at what age did you stop? \_\_\_\_\_

How much caffeinated coffee do you currently drink?

- ☐ None
- ☐ Less than 2 cups a week
- ☐ Equal to or more than 2 but not more than 6 cups a week
- ☐ 1-2 cups a day
- ☐ 3-5 cups a day
- ☐ 6 or more cups a day

How much caffeinated **TEA** do you (or did you) drink and for how many years? (A **cup** is the size of a china cup. A **mug** is 2 cups). Check all that apply.

- ☐ None
- ☐ Less than 2 cups a week, for \_\_\_\_\_ years (*specify number of years*)
- ☐ Equal to or more than 2 but not more than 6 cups a week, for \_\_\_\_\_ years
- ☐ 1-2 cups a day, for \_\_\_\_\_ years
- ☐ 3-5 cups a day, for \_\_\_\_\_ years
- ☐ 6 or more cups a day, for \_\_\_\_\_ years



At what age did you start drinking caffeinated tea? \_\_\_\_\_

Are you still drinking caffeinated tea? ☐Yes ☐No If not, at what age did you stop? \_\_\_\_\_

How much caffeinated tea do you currently drink?

- ☐None
- ☐Less than 2 cups a week
- ☐Equal to or more than 2 but not more than 6 cups a week
- ☐1-2 cups a day
- ☐3-5 cups a day
- ☐6 or more cups a day

How much caffeinated SODA do you (or did you) drink and for how many years? Check all that apply.

- ☐None
- ☐Less than 2 cans a week, for \_\_\_\_\_ years (*specify number of years*)
- ☐Equal to or more than 2 but not more than 6 cans a week, for \_\_\_\_\_ years
- ☐1-2 cans a day, for \_\_\_\_\_ years
- ☐3-5 cans day, for \_\_\_\_\_ years
- ☐6 or more cans a day, for \_\_\_\_\_ years

At what age did you start drinking caffeinated soda? \_\_\_\_\_

Are you still drinking caffeinated soda? ☐Yes ☐No If not, at what age did you stop? \_\_\_\_\_

How much caffeinated soda do you currently drink?

- ☐None
- ☐Less than 2 cans a week
- ☐Equal to or more than 2 but not more than 6 cans a week
- ☐1-2 cans a day
- ☐3-5 cans a day
- ☐6 or more cans a day

## ALCOHOL

How much alcohol do you (or did you) drink, and for how many years? 1 drink is a beer, or a glass of wine, or a shot of liquor. Check all that apply.

- ☐Never
- ☐Less than 2 drinks a week, for \_\_\_\_\_ years (*specify number of years*)
- ☐2-6 drinks a week, for \_\_\_\_\_ years (*specify number of years*)
- ☐1 drink a day, for \_\_\_\_\_ years (*specify number of years*)
- ☐2 drinks a day, for \_\_\_\_\_ years (*specify number of years*)
- ☐3 or more drinks a day, for \_\_\_\_\_ years (*specify number of years*)

At what age did you start drinking alcohol? \_\_\_\_\_

Are you still drinking? ☐Yes ☐No If not, at what age did you stop? \_\_\_\_\_

How much alcohol do you currently drink?

- ☐Not at all
- ☐Less than 2 drinks a week
- ☐2-6 drinks a week
- ☐1 drink a day
- ☐2 drinks a day
- ☐3 or more drinks a day

## NSAIDs

NSAIDs are non-steroidal anti-inflammatory drugs, like Ibuprofen, Motrin IB, Advil and Aleve, which are commonly used for pain. Aspirin and acetaminophens like Tylenol are not NSAIDs.

How often do you (or did you) take over the counter NSAIDs (like Ibuprofen, Motrin IB, Advil and Aleve), and for how many years? Check all that apply

- ☐ Never
- ☐ Less than once a week, for \_\_\_\_\_ years (*specify number of years*)
- ☐ About one to four times a week, for \_\_\_\_\_ years
- ☐ About 5 to 10 times a week, for \_\_\_\_\_ years
- ☐ More than 10 times a week, for \_\_\_\_\_ years

How old were you when you started taking over the counter NSAIDs? \_\_\_\_\_

How often do (or did) you take prescription NSAIDs, and for how many years? Check all that apply.

- ☐ Never
- ☐ Less than once a week, for \_\_\_\_\_ years (*specify number of years*)
- ☐ About one to four times a week, for \_\_\_\_\_ years
- ☐ About 5 to 10 times a week, for \_\_\_\_\_ years
- ☐ More than 10 times a week, for \_\_\_\_\_ years

How old were you when you started taking prescription NSAIDs? \_\_\_\_\_

## OCCUPATION

Please indicate the types of work you have done over your lifetime, Check all that apply and give the year you started and stopped each occupation. If you don't remember the exact years, give us your best estimate.

|                                                         | Year started | Year ended |
|---------------------------------------------------------|--------------|------------|
| <input type="checkbox"/> Agriculture                    | _____        | _____      |
| <input type="checkbox"/> Gas                            | _____        | _____      |
| <input type="checkbox"/> Electricity                    | _____        | _____      |
| <input type="checkbox"/> Water and sewer                | _____        | _____      |
| <input type="checkbox"/> Transportation                 | _____        | _____      |
| <input type="checkbox"/> Mining                         | _____        | _____      |
| <input type="checkbox"/> Construction                   | _____        | _____      |
| <input type="checkbox"/> Manufacturing                  | _____        | _____      |
| <input type="checkbox"/> Physician or nurse             | _____        | _____      |
| <input type="checkbox"/> Office job                     | _____        | _____      |
| <input type="checkbox"/> Other                          |              |            |
| <input type="checkbox"/> Did not work outside the house |              |            |

## RESIDENCE

Please tell us about all the places you have lived from birth to your current home address.

Give the years you were at each place (If you don't remember the exact years, give your best estimate.)

| Year moved in | Year moved out | Town | State | Country |
|---------------|----------------|------|-------|---------|
| Birth year    |                |      |       |         |
|               |                |      |       |         |
|               |                |      |       |         |
|               |                |      |       |         |
|               |                |      |       |         |
|               |                |      |       |         |
|               |                |      |       |         |
|               |                |      |       |         |

## FAMILY HISTORY

From what country did your **father's ancestors** immigrate to the US? \_\_\_\_\_

From what country did your **mother's ancestors** immigrate to the US? \_\_\_\_\_

Are you Hispanic or Latino? ☐ No ☐ Yes

What race do you most identify yourself with?

☐ White ☐ Black or African American ☐ American Indian/Alaskan Native  
☐ Asian ☐ Native Hawaiian or other Pacific Islander ☐ More than one race

Are you of Jewish ancestry? ☐ No ☐ Yes

If you are from a particular ethnic or religious lineage please specify. This is a question of heritage and genetic lineage, not personal preference: \_\_\_\_\_

Do you have any blood relatives who have **Parkinson's disease** (including your parents, grand-parents, siblings, aunts and uncles)? ☐ No ☐ Yes

If yes, for each relative who has or had PD, list their relationship to you.

(1) \_\_\_\_\_ (2) \_\_\_\_\_  
(3) \_\_\_\_\_ (4) \_\_\_\_\_

Do you have any blood relatives who have **rapid eye movement sleep behavior disorder (RBD)** (including your parents, grand-parents, siblings, aunts and uncles)? ☐ No ☐ Yes

If yes, for each relative who has or had RBD, list their relationship to you.

(1) \_\_\_\_\_ (2) \_\_\_\_\_  
(3) \_\_\_\_\_ (4) \_\_\_\_\_

**Thank you for completing the questionnaire.**

**Please mail it back with the stool sample and the Gut Microbiome Questionnaire using the pre-stamped envelope. You may drop the envelope at any US postal service box.**

## Supplementary Figure 2. Global composition of gut metagenome in PD differs from NHC.

**(a)** Principal component (PC) analysis using Aitchison distances between 490 PD (blue-green) and 234 neurologically healthy control (NHC; orange) metagenomes with all species and **(b)** excluding species present in <5% of samples. Results are similar and both show greater dispersion in PD samples (PERMDISP  $P < 1E-4$ , PERMANOVA  $P < 1E-4$ ). **(c)** Enterotype profiles. 284 (58%) of PD metagenomes and 166 (71%) of NHC metagenomes were assigned an enterotype with confidence. The distribution of enterotype frequency in PD was significantly different from NHC ( $P = 1E-4$ ).

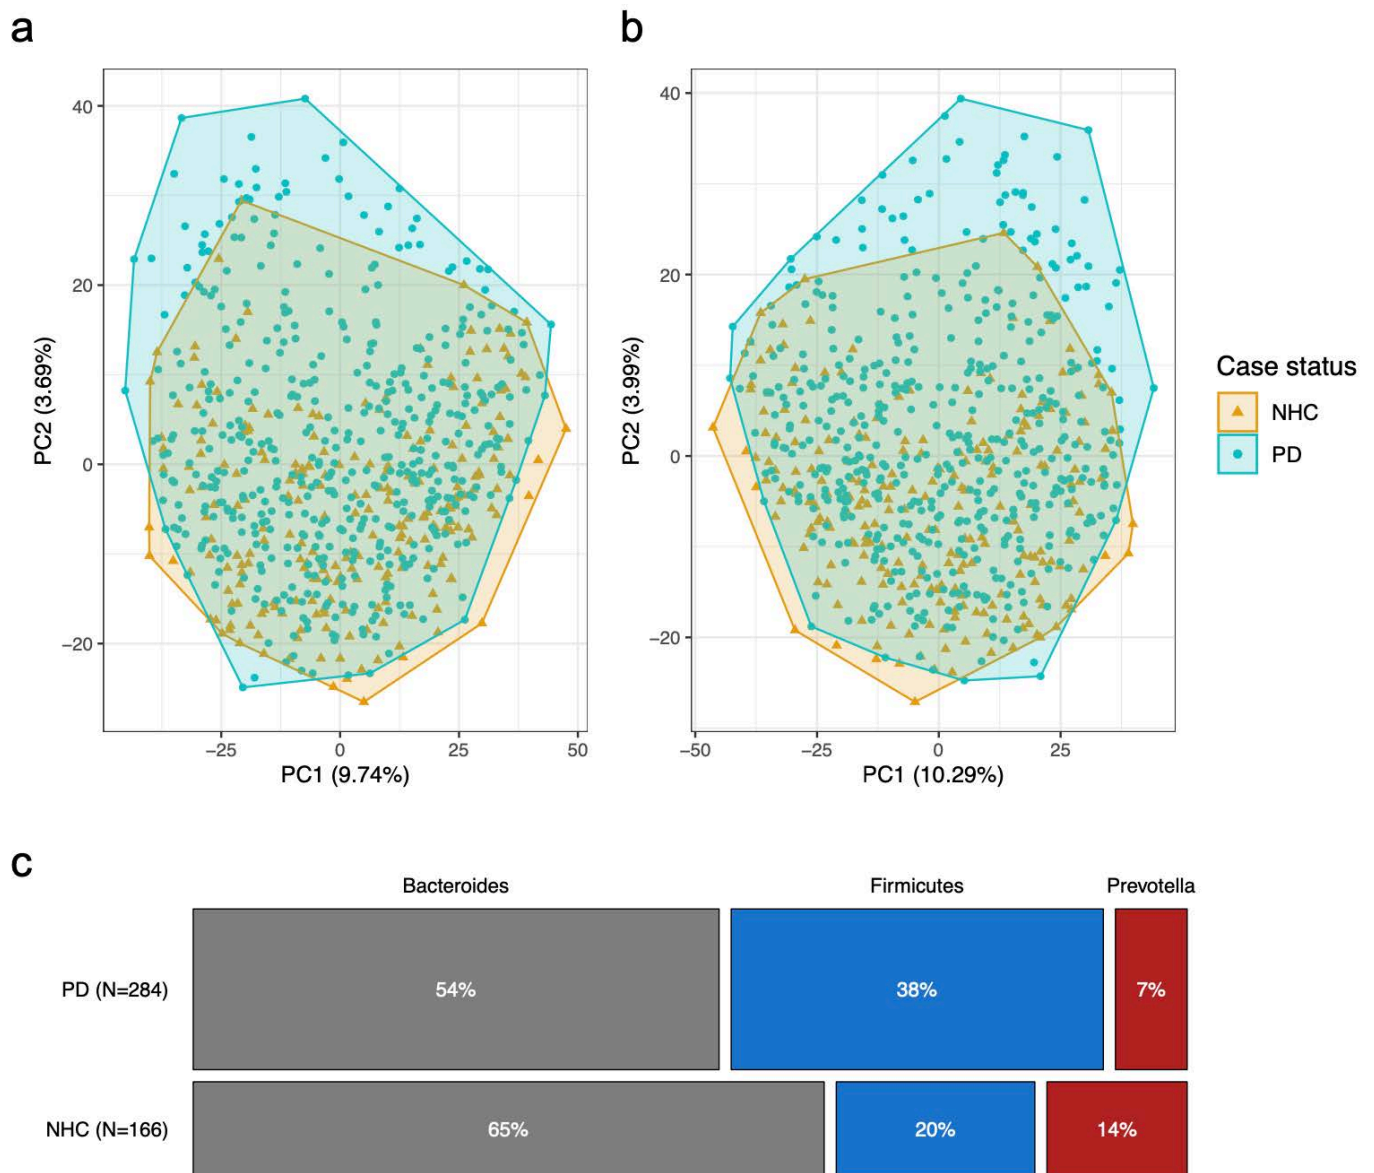

### **Supplementary Figure 3. PD-associated species' abundance distribution and fold change.**

Analysis included N=724 biologically independent samples from 490 PD and 234 neurologically healthy control (NHC) subjects. Relative abundances, bias-corrected absolute abundances, and fold changes of 84 species that emerged from MWAS as having significantly elevated or significantly reduced abundances in PD vs. NHC were plotted. In MWAS, significance was defined as concordance between MaAsLin2 and ANCOM-BC with  $FDR < 0.05$  in one and  $FDR \leq 0.1$  in the other. **(a)** Distribution of relative abundances. Log2 transformed relative abundance values, as used in MaAsLin2, were used here to generate the boxplots. Untransformed relative abundances, shown in parenthesis, are provided on the x-axis for easier interpretation of data. Boxplots show distribution of the data for PD (blue green) and NHC (orange). Each sample was plotted according to its abundance of the species. The left, middle, and right vertical boundaries of each box represent the first, second (median), and third quartiles of the data; that is, 25% of samples have abundance lower than the left border of the box, 25% of samples have abundances that are higher than the right border of the box. Absence of a box indicates  $\geq 75\%$  of samples had zero abundance. The lines extending from the two ends of each box represent 1.5x outside the interquartile range (range = (abundance value at 75% minus abundance value at 25%)  $\times$  1.5). Points beyond the lines are outlier samples. **(b)** Distribution of bias-corrected absolute abundances (used in ANCOM-BC). Natural log transformed, sampling-bias corrected absolute abundances, as used in ANCOM-BC, were used here to generate the boxplots. Untransformed bias-corrected absolute abundances, shown in parenthesis, are provided on the x-axis for easier interpretation of data. Description of boxplots are the same as for (a). **(c)** Absolute fold change in differential abundance in PD vs. NHC (squares and circles) and its 95% confidence interval (CI; solid and dashed lines), calculated from beta and standard errors estimated by MaAsLin2 (square with solid line of 95% CI), and ANCOM-BC (circle with dotted line of 95% CI). Points and lines for fold changes and 95% CI were colored blue (elevated in PD) or red (reduced in PD).



**Supplementary Figure 4. Species correlation networks for PD and neurologically healthy controls.**

Analysis included N=724 biologically independent samples from 490 PD and 234 NHC subjects. All species that were detected were tested for pair-wise correlation in PD or NHC metagenomes separately. Correlation networks were constructed including species with a correlation of  $|r| > 0.2$  and permuted P-value  $< 0.05$  with at least one other species. Clusters of species within networks were defined by Louvain algorithm and were randomly assigned a color and a number. Each circle (node) denotes a species and the curved lines (edges) connect correlated species. 26 clusters were defined in the PD network and 20 in the NHC network. PD-associated species mapped to 12 clusters in the PD network (mainly in clusters 2, 8, 10 and 13), and 11 clusters in the NHC network (mainly in 2, 3, and 8). 244 of 719 species did not map to a cluster in either PD or NHC networks as they had no correlation with another species at  $|r| > 0.2$  and  $P < 0.05$ , including 2 PD-associated species, one of which was elevated in PD and the other reduced. **(a)** PD metagenome network with algorithmically defined clusters of correlated species. **(b)** PD metagenome network with species that emerged from MWAS as having significantly higher abundance in PD than NHC are colored blue, and those that had significantly lower abundance in PD than NHC colored red. **(c)** NHC metagenome network with algorithmically defined clusters of correlated species. As colors and numbers were assigned randomly, they do not correspond to colors and numbers in PD network. **(d)** NHC metagenome network with species that emerged from MWAS as having significantly higher abundance in PD than NHC colored blue, and those that had significantly lower abundance in PD than NHC colored red.



**a**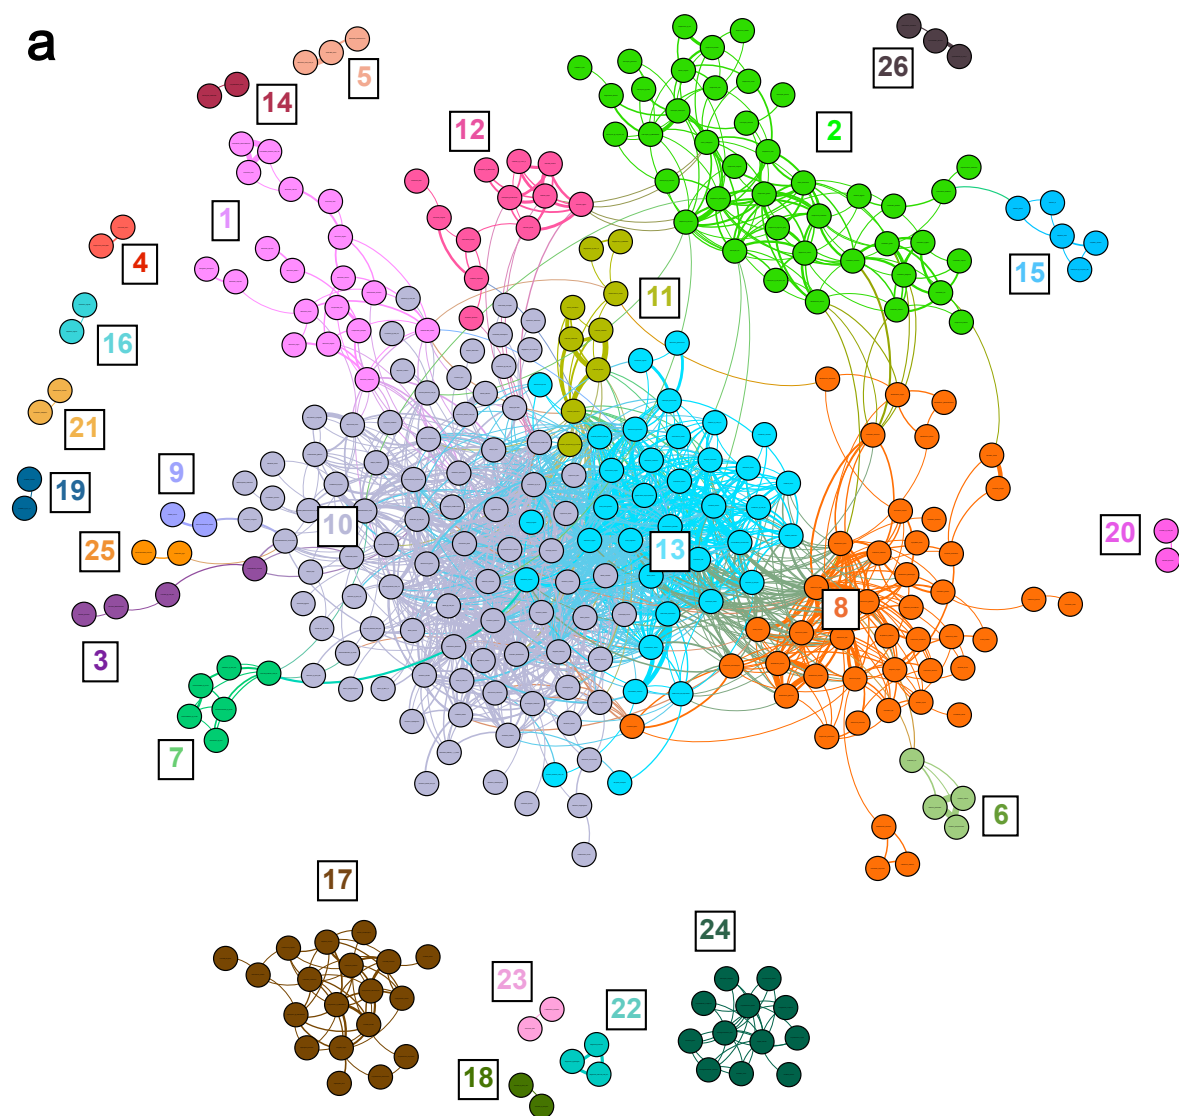**b**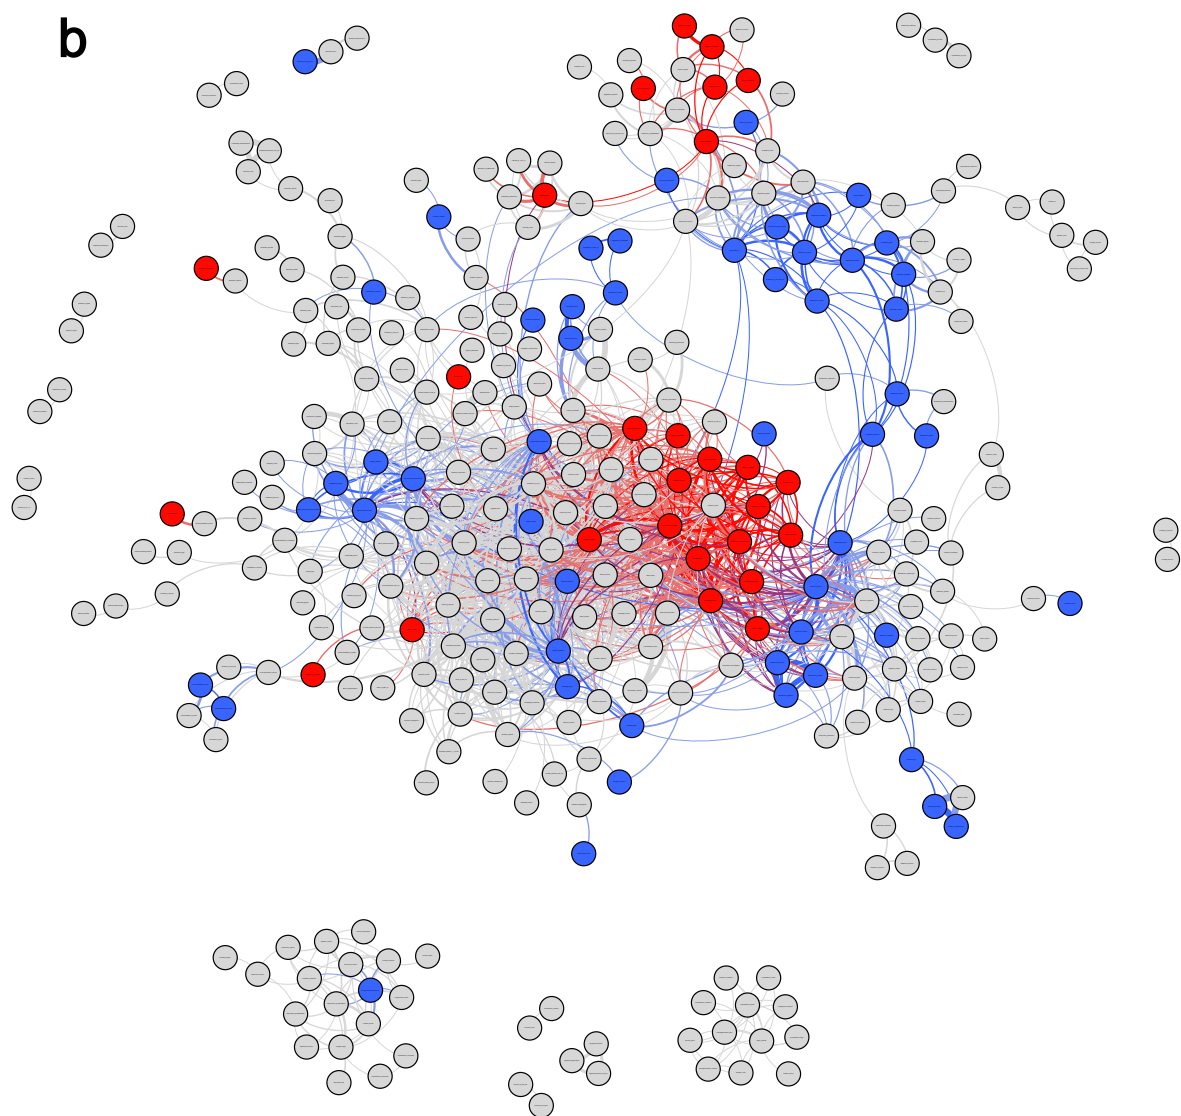**c**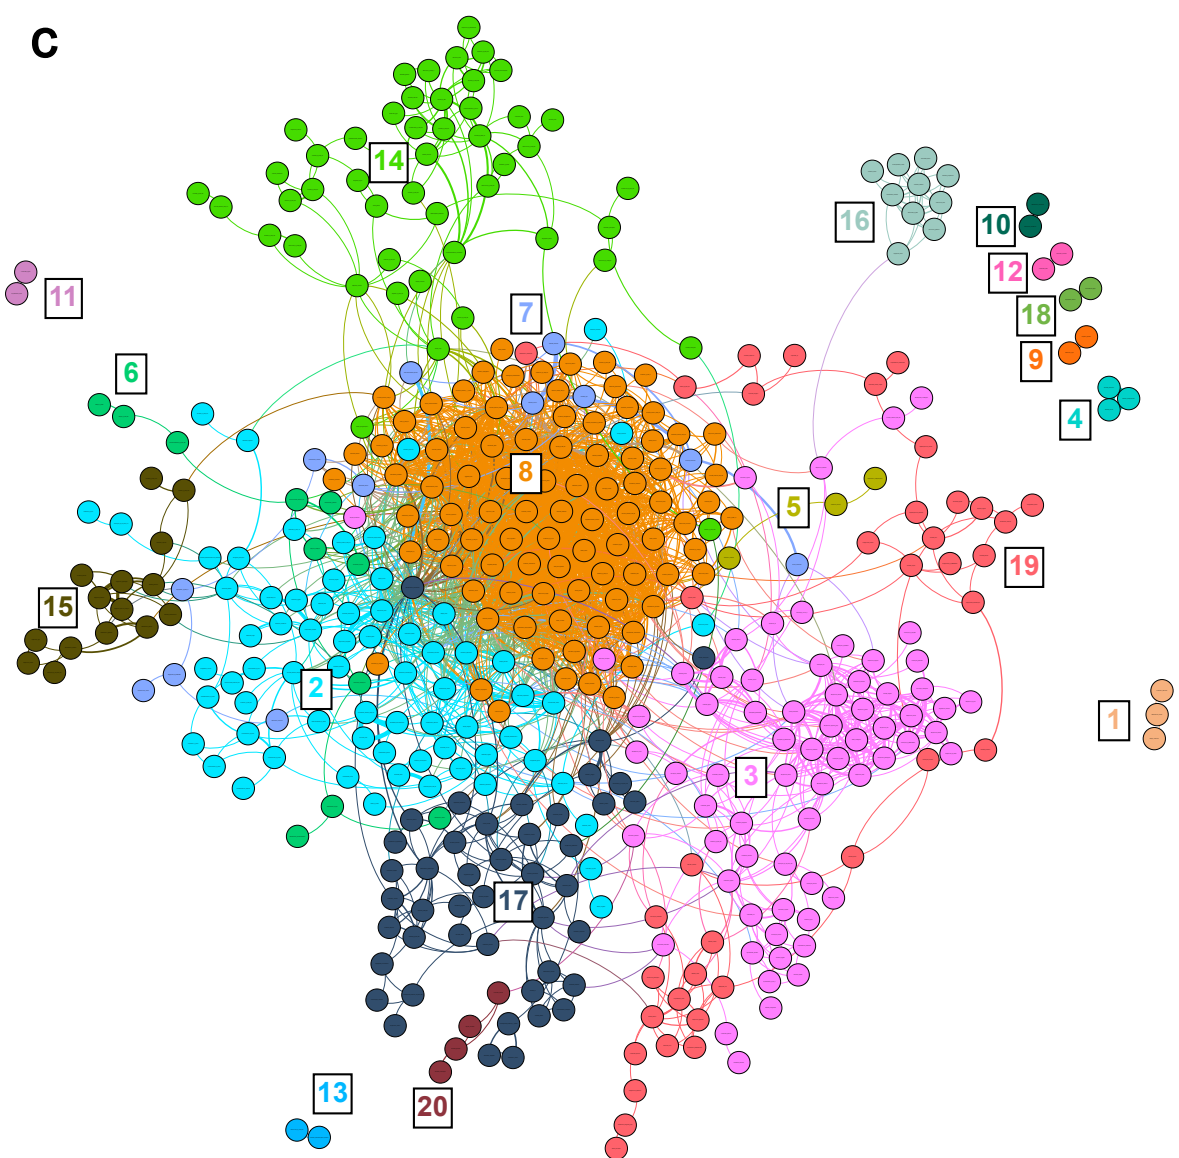**d**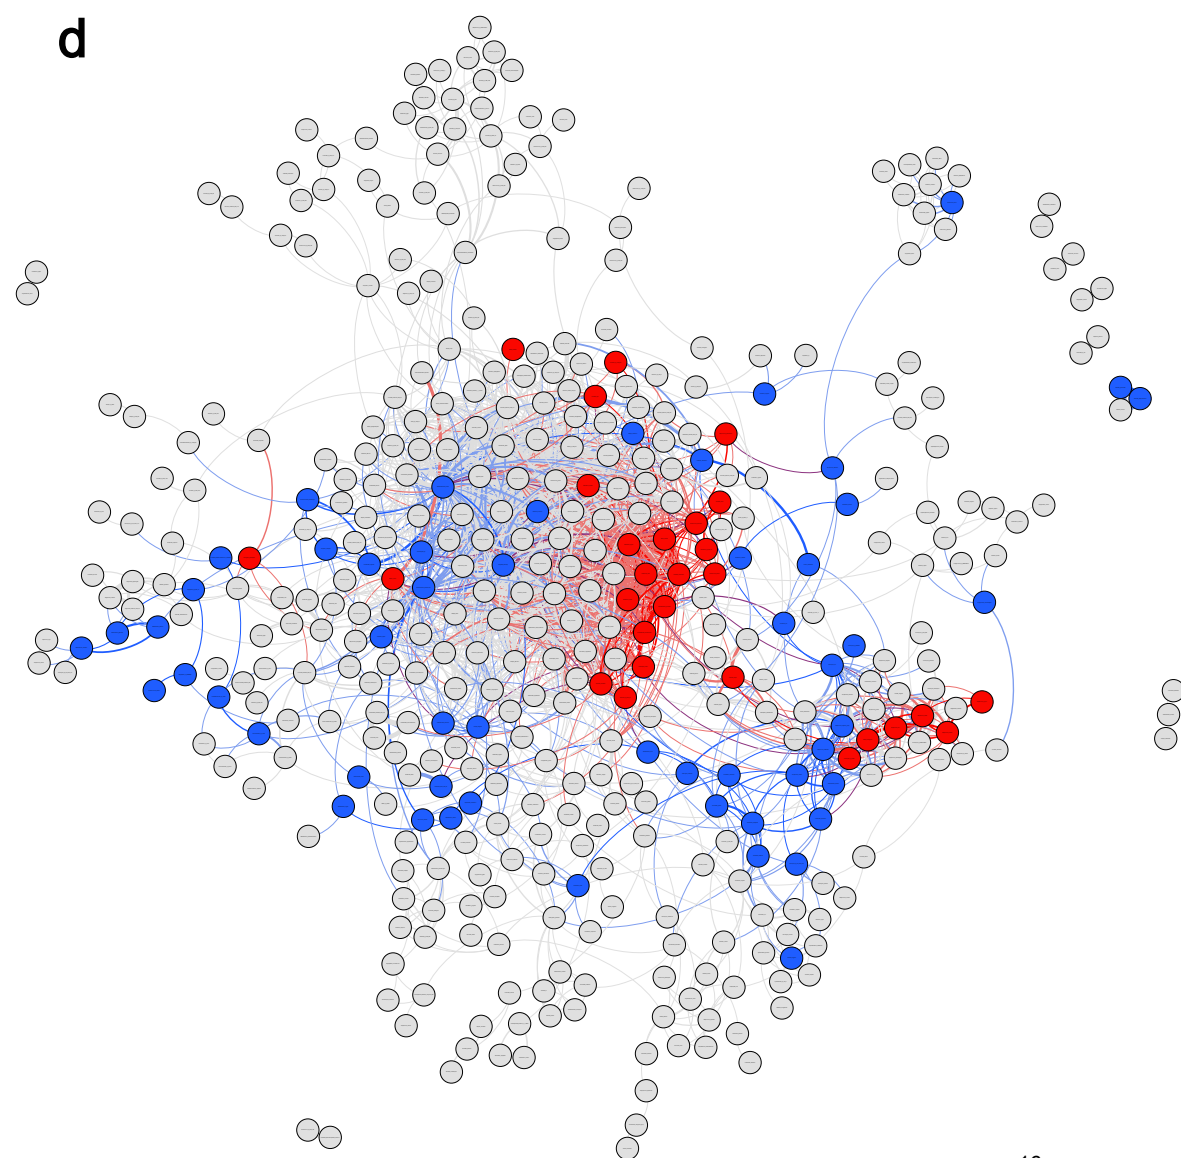

Supplement: MOESM1 [file 41467_2022_34667_MOESM1_ESM.pdf]
